# Supplementary material for: Methylation status of vault RNA 2-1 promoter is a predictor of glycemic response to glucagon-like peptide-1 analog therapy in type 2 diabetes mellitus
Source: HighWire-hosted journal article supplement (doi:10.1136/bmjdrc-2020-001416), 2021-03-01
Supplement: bmjdrc-2020-001416supp001_data_supplement.pdf [file bmjdrc-2020-001416supp001_data_supplement.pdf]

## SUPPLEMENTARY DATA

### **Methylation Status of Vault RNA 2-1 Promoter Is a Predictor of Glycemic Response to Glucagon-like Peptide-1 Analogue Therapy in Type 2 Diabetes Mellitus**

Chia-Hung Lin, Yun-Shien Lee, Yu-Yao Huang, Chi-Neu Tsai

#### **List of supplemental Tables**

**Supplemental Table S1** Demographic variables of 10 participants (training group) applied for DNA methylation chip at baselines

**Supplement Table S2** Demographic variables of participants (validation group) enrolled in this study

**Supplemental Table S3** Primers used for bisulfite sequencing primers (BSP), pyrosequencing reaction and centromeric CTCF polymorphism

**Supplemental Table S4** Differentially methylated regions (DMRs) in human genome and association with glycemic response of GLP-1 treatment in training group

#### **List of supplemental Figures**

**Supplement Figure S1:** A gender difference was identified in Infinium® MethylationEPIC BeadChip analysis in the training group of this study through volcano and heatmap plot.

**Supplemental Fig. S2:** The volcano plots of the differentially methylation comparing responsive and non-responsive groups before and after GLP-1 analogue treatment.

**Supplemental Fig. S3:** Serum level of TGF- $\beta$ 1 as a predictor of a glycemic response to GLP-1 analogue treatment and the correlation of *VTRNA2-1* RNA expression versus its promoter methylation status.

**Supplement Figure S4:** The association between change in A1C and (A) *VTRNA 2-1* methylation level, (B) TGF-beta1 levels, and (C) mRNA levels of *VTRNA 2-1*

**Supplemental Table S1** Demographic variables of 10 participants (training group) applied for DNA methylation chip at baselines

| Variables              | Responsive<br><i>n</i> =7 | Non-responsive<br><i>n</i> =3 | <i>P</i> |
|------------------------|---------------------------|-------------------------------|----------|
| Age (years)            | 56.6 ±10.0                | 46.0±21.6                     | 0.302    |
| Sex (female %)         | 28.6                      | 33.3                          | 0.301    |
| BMI                    | 27.8±5.5                  | 32.1±3.8                      | 0.760    |
| DM duration (years)    | 11.8 ± 7.8                | 10.0 ± 2.6                    | 0.345    |
| HbA1c at baselines (%) | 11.1 ± 1.9                | 9.5 ± 0.7                     | 0.358    |
| Comorbidity (%)        |                           |                               |          |
| Hypertension           | 71.4                      | 66.7                          | 0.880    |
| Hyperlipidemia         | 71.4                      | 66.7                          | 0.880    |
| Chronic kidney disease | 57.1                      | 33.3                          | 0.490    |
| Cardiovascular disease | 14.3                      | 33.3                          | 0.490    |
| Concurrent therapy (%) |                           |                               |          |
| Statins                | 42.9                      | 0                             | 0.475    |
| ACEI/ARB               | 14.3                      | 66.7                          | 0.098    |
| CCB                    | 57.1                      | 33.3                          | 0.490    |
| Beta-blocker           | 28.6                      | 33.3                          | 0.880    |
| Insulin                | 100                       | 100                           | -        |
| Sulfonylurea           | 0                         | 0                             | -        |

|                   |   |   |   |
|-------------------|---|---|---|
| Thiazolidinedione | 0 | 0 |   |
| Metformin         | 0 | 0 |   |
| Acarbose          | 0 | 0 |   |
| Glinide           | 0 | 0 | - |

ACEI/ARB : Angiotensin- converting enzyme inhibitor/ Angiotensin receptor blocker

CCB: Calcium channel blocker

**Supplemental Table S2** Demographic variables of participants (validation group) enrolled in this study

| Variables              | Responsive<br><i>n</i> =93 | Non-responsive<br><i>n</i> =35 | <i>P</i>    |
|------------------------|----------------------------|--------------------------------|-------------|
| Age                    | 54.6 ±13.9                 | 50.7 ±13.7                     | 0.189       |
| Sex (female %)         | 47.3                       | 58.3                           | 0.326       |
| BMI                    | 27.9 ±5.3                  | 28.6 ±5.2                      | 0.563       |
| DM duration (years)    | 12.3 ± 1.4                 | 11.6 ± 3.7                     | 0.684       |
| HbA1c before GLP-1 (%) | 10.4 ± 0.3                 | 10.3 ± 0.5                     | 0.875       |
| HbA1c after GLP-1 (%)  | 8.6 ± 0.5                  | 11.1 ± 0.2                     | < 0.0001*** |
| Comorbidity (%)        |                            |                                |             |
| Hypertension           | 62.5                       | 42.9                           | 0.447       |
| Hyperlipidemia         | 75.0                       | 42.9                           | 0.205       |
| Chronic kidney disease | 62.5                       | 44.3                           | 0.737       |
| Cardiovascular disease | 9.4                        | 5.3                            | 0.597       |
| Concurrent therapy (%) |                            |                                |             |

|                   |      |      |       |
|-------------------|------|------|-------|
| Statins           | 62.5 | 28.6 | 0.189 |
| ACEI/ARB          | 50.0 | 28.6 | 0.398 |
| CCB               | 62.5 | 28.6 | 0.189 |
| Beta-blocker      | 12.5 | 14.3 | 0.919 |
| Insulin           | 67.9 | 77.8 | 0.357 |
| Sulfonylurea      | 43.8 | 44.4 | 0.973 |
| Thiazolidinedione | 0    | 0    | -     |
| Metformin         | 87.5 | 100  | 0.245 |
| Acarbose          | 12.5 | 10.0 | 0.846 |
| Glinide           | 12.5 | 20.0 | 0.606 |

---

ACEI/ARB : Angiotensin- converting enzyme inhibitor/ Angiotensin receptor blocker

CCB: Calcium channel blocker

\*\*\* $P<0.001$

**Supplement Table S3** Primers used for bisulfite sequencing primers (BSP), pyrosequencing reaction and centromeric CTCF (rs2346018) polymorphism

| Gene Name                                           | Sense 5'-3'                     | Antisense 5'-3'                     | Size( bp) | Position (GRCh37/hg19 Assembly ) |
|-----------------------------------------------------|---------------------------------|-------------------------------------|-----------|----------------------------------|
| VTRNA2-1<br>BSP                                     | TTGAAATTTTAAATTATAG<br>AAGAGTGA | ATAAATAAATTTTACCC<br>CCTTCCAC       | 197       | chr5:135,416,303-135,416,499     |
| Pyrosequencing-<br>VTRNA2-1                         | AGAGGGAAGGGTTGTATGTGT           | AAAAAACTAAAAATCC<br>CTCCAA (Biotin) | 113       | chr5:135,416,339-135,416,451     |
| Pyrosequencing-<br>VTRNA2-1<br>Sequencing<br>primer | TTTAGTTTTAGAGAGGTTTG            |                                     |           | Chr5:135,416,358-135,416,380     |
| Centromeric<br>CTCF site<br>(rs2346018)             | ATGGTGGTACCAGAGCAAGG            | GAGAAAATGCCTGCGTC<br>TCT            | 178       | chr5:136,079,522-136,079,699     |

```

135416338  GAGAGGGACG GGCTGCATGT GCTCCC CGCC
              └──────────────────┘
135416368  CCGAGAGGC CTGCGTCATG CGGTCTCGCC
              └──────────┘ ▲ cg0653661 ▲ cg26328633
135416398  CGCTCTGCGC CAGGCGTCCT GCTAACGTGT
              ▲ cg25340688
135416428  CCTGGAGGGA CTCTCAGTTC CTCCCGCCCG
              └──────────────────┘
135416458  CATCCTGCGC GGGAACCGTG GAAGGGGGCA
135416488  AAATCCACCC ACTGGAGGGG AGGCAGGAGG

```

Pyrosequencing:

Blue: Forward primer

Green: Sequencing primer

Purple: Reverse primer

▲ : EPIC array probes

**Supplemental Table S4** Differentially methylated regions (DMRs) in human genome and association with glycemic response of GLP-1 treatment in training group

| Chromosome | Start     | End       | Width<br>(bp) | <i>P</i>       | Genes     |
|------------|-----------|-----------|---------------|----------------|-----------|
| chr5       | 135415693 | 135416613 | 920           | < 0.0000000001 | VTRNA2-1  |
| chr2       | 113992694 | 113993313 | 619           | 0.00002        | PAX8      |
| chr8       | 143751533 | 143751796 | 263           | 0.00002        | PSCA      |
| chr16      | 70472993  | 70473294  | 301           | 0.00002        | ST3GAL2   |
| chr1       | 205819179 | 205819609 | 430           | 0.00004        | PM20D1    |
| chr6       | 29648161  | 29649092  | 931           | 0.00008        | ZFP57     |
| chr20      | 2187237   | 2187844   | 607           | 0.0001         | LINC00654 |
| chr6       | 31275267  | 31276669  | 1402          | 0.0006         | HLA-B     |
| chr13      | 23309689  | 23310675  | 986           | 0.0006         | -         |
| chr1       | 202310824 | 202311492 | 668           | 0.0007         | UBE2T     |

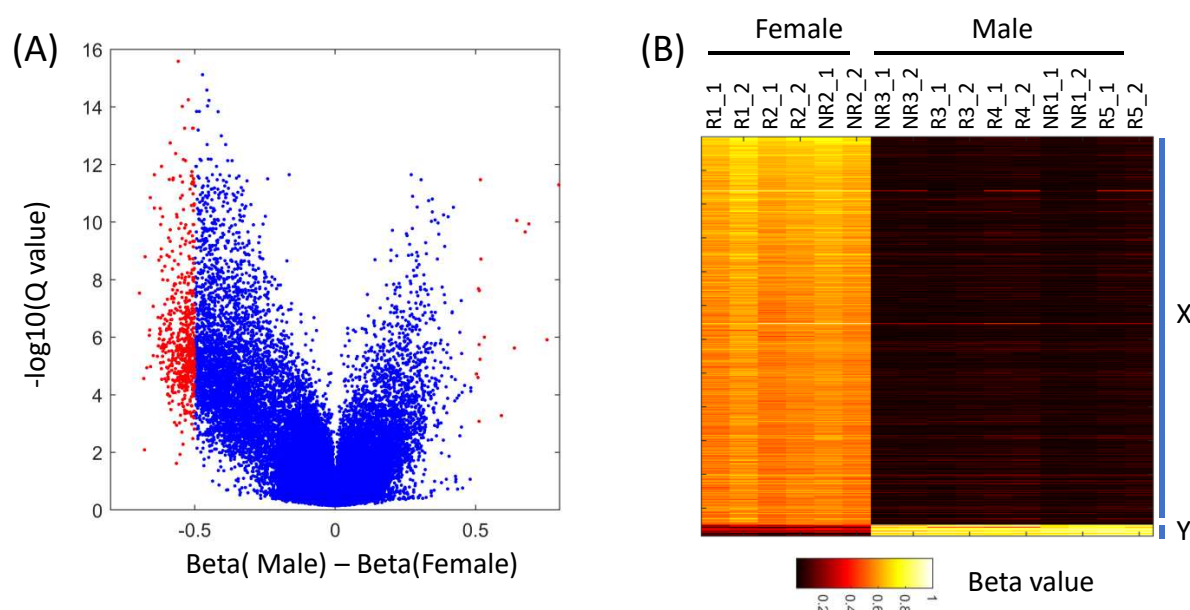

**Supplement Figure S1** A gender difference was identified in Infinium® MethylationEPIC BeadChip analysis in the training group of this study through (A) volcano plot and (B) heatmap plot. (A) Volcano plot, X-axis: different of beta value between male and female, Y-axis: the  $-\log_{10}$  Q value. Q value was the false discovery rate adjusted p value of the  $t$  test by comparing the means of beta value between male and female. The probe with Q value < 0.05 and difference of beta value between male and female > 0.5 were labeled with red spot. (B) Heatmap plot, differential expression probes labeled with red spots were plotted. The color map of the beta value was indicated. The probes located at X any Y chromosome were illustrated. Each number indicates the enrolled patients. The number-1 indicated genomic DNA extracted before GLP-1 analogue therapy; whereas number-2 indicated the genomic DNA extracted after GLP-1 analogue treatment.



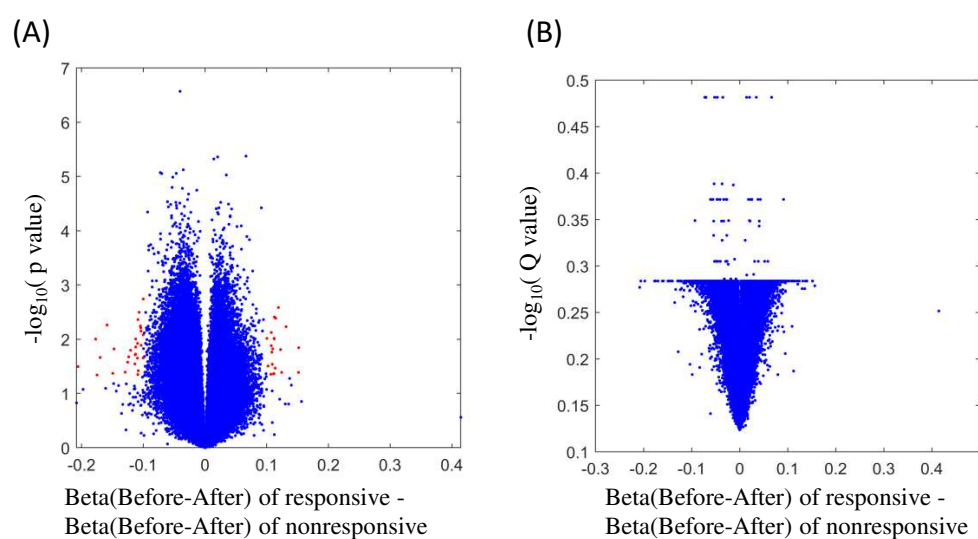

**Supplement Figure S2** The volcano plots of the differentially methylation comparing responsive and non-responsive groups before and after GLP-1 analogue treatment. The X- axis: the difference between responsive and non-responsive of the beta value before and after GLP-1 analogue treatment. The Y-axis: the  $-\log_{10}$  p value at (A), and the  $-\log_{10}$  Q value at (B). The p value was the  $t$  test comparing the means of beta value between responsive and non-responsive groups. The Q value was the false discovery rate adjusted p value. There was no differentially methylated region detected by the multiple test adjusted Q value.

(A)

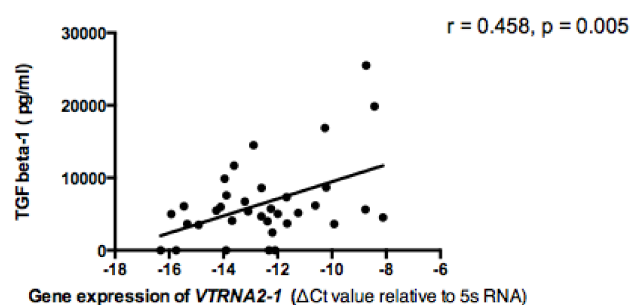

(B)

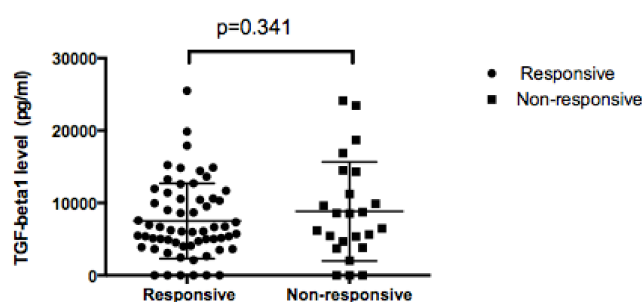

(C)

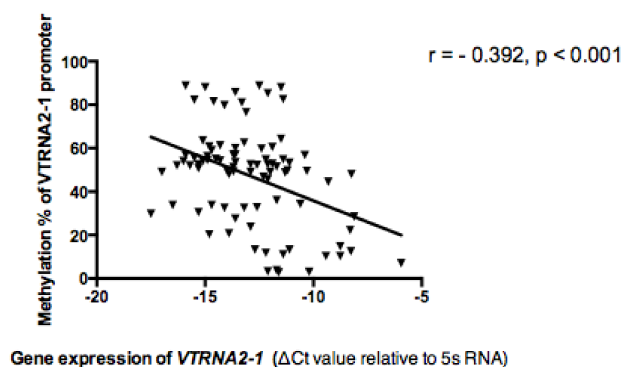

**Supplemental Figure S3** Serum level of TGF-β1 as a predictor of a glyceimic response to GLP-1 analogue treatment and the correlation of *VTRNA2-1* RNA expression versus its promoter methylation status. (A) Correlation of the gene expression of *VTRNA2-1* and serum level of TGF-β1 levels. (B) The serum level of TGF-β1 as a predictor for a glyceimic response to GLP-1 analogue treatment. (C) Correlation between the *VTRNA 2-1* mRNA expression and methylation status of *VTRNA 2-1* promoter region.

(A)  $r = 0.374, p = 0.001$

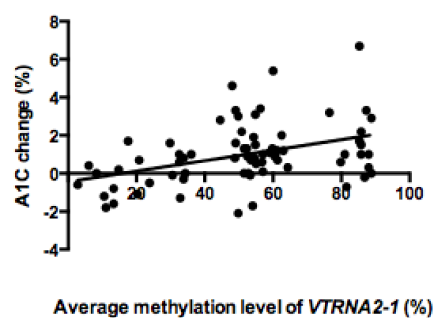

(B)  $r = -0.041, p = 0.758$

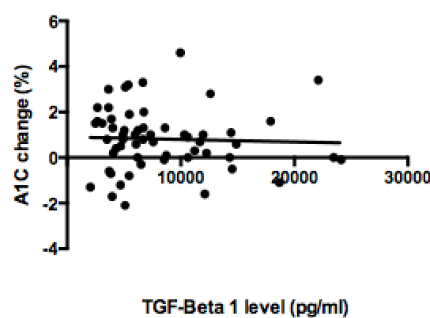

(C)  $r = 0.204, P = 0.095$

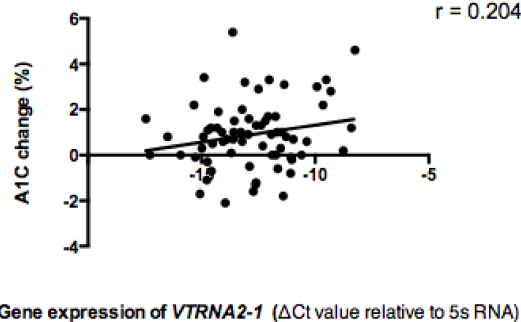

**Supplement Figure S4** The association between change in A1C and (A) *VTRNA 2-1* methylation level, (B) TGF-beta1 levels, and (C) mRNA levels of *VTRNA 2-1*.
